# Supplementary material for: A 3-way hybrid approach to generate a new high-quality chimpanzee reference genome (Pan_tro_3.0)
Source: PubMed Central journal article supplement (PMC5714192; doi:10.1093/gigascience/gix098), 2017-10-30

# GigaScience

## A 3-way hybrid approach to generate a new high quality chimpanzee reference genome (Pan\_tro\_3.0) --Manuscript Draft--

|                             |                                                                                                                                                                                                                                                                                                                                                                                                                                                                                                                                                                                                                                                                                                                                                                                                                                                                                                                                                                                                                                                                                                                                                                                                                                                                                                                                                                                                                                                                                                                                                                                                                                                                                                                                              |                        |
|-----------------------------|----------------------------------------------------------------------------------------------------------------------------------------------------------------------------------------------------------------------------------------------------------------------------------------------------------------------------------------------------------------------------------------------------------------------------------------------------------------------------------------------------------------------------------------------------------------------------------------------------------------------------------------------------------------------------------------------------------------------------------------------------------------------------------------------------------------------------------------------------------------------------------------------------------------------------------------------------------------------------------------------------------------------------------------------------------------------------------------------------------------------------------------------------------------------------------------------------------------------------------------------------------------------------------------------------------------------------------------------------------------------------------------------------------------------------------------------------------------------------------------------------------------------------------------------------------------------------------------------------------------------------------------------------------------------------------------------------------------------------------------------|------------------------|
| <b>Manuscript Number:</b>   | GIGA-D-16-00140                                                                                                                                                                                                                                                                                                                                                                                                                                                                                                                                                                                                                                                                                                                                                                                                                                                                                                                                                                                                                                                                                                                                                                                                                                                                                                                                                                                                                                                                                                                                                                                                                                                                                                                              |                        |
| <b>Full Title:</b>          | A 3-way hybrid approach to generate a new high quality chimpanzee reference genome (Pan_tro_3.0)                                                                                                                                                                                                                                                                                                                                                                                                                                                                                                                                                                                                                                                                                                                                                                                                                                                                                                                                                                                                                                                                                                                                                                                                                                                                                                                                                                                                                                                                                                                                                                                                                                             |                        |
| <b>Article Type:</b>        | Data Note                                                                                                                                                                                                                                                                                                                                                                                                                                                                                                                                                                                                                                                                                                                                                                                                                                                                                                                                                                                                                                                                                                                                                                                                                                                                                                                                                                                                                                                                                                                                                                                                                                                                                                                                    |                        |
| <b>Funding Information:</b> | Ministerio de Economía y Competitividad (BFU2014-55090-P)                                                                                                                                                                                                                                                                                                                                                                                                                                                                                                                                                                                                                                                                                                                                                                                                                                                                                                                                                                                                                                                                                                                                                                                                                                                                                                                                                                                                                                                                                                                                                                                                                                                                                    | Mr Tomas Marques-Bonet |
|                             | Stiftelsen för Strategisk Forskning (F06-0045)                                                                                                                                                                                                                                                                                                                                                                                                                                                                                                                                                                                                                                                                                                                                                                                                                                                                                                                                                                                                                                                                                                                                                                                                                                                                                                                                                                                                                                                                                                                                                                                                                                                                                               | Mr Lars Feuk           |
|                             | National Institutes of Health (DA033660)                                                                                                                                                                                                                                                                                                                                                                                                                                                                                                                                                                                                                                                                                                                                                                                                                                                                                                                                                                                                                                                                                                                                                                                                                                                                                                                                                                                                                                                                                                                                                                                                                                                                                                     | Mr Andrew J. Sharp     |
|                             | National Institutes of Health (HG006696)                                                                                                                                                                                                                                                                                                                                                                                                                                                                                                                                                                                                                                                                                                                                                                                                                                                                                                                                                                                                                                                                                                                                                                                                                                                                                                                                                                                                                                                                                                                                                                                                                                                                                                     | Mr Andrew J. Sharp     |
|                             | National Institutes of Health (HD073731)                                                                                                                                                                                                                                                                                                                                                                                                                                                                                                                                                                                                                                                                                                                                                                                                                                                                                                                                                                                                                                                                                                                                                                                                                                                                                                                                                                                                                                                                                                                                                                                                                                                                                                     | Mr Andrew J. Sharp     |
|                             | National Institutes of Health (MH097018)                                                                                                                                                                                                                                                                                                                                                                                                                                                                                                                                                                                                                                                                                                                                                                                                                                                                                                                                                                                                                                                                                                                                                                                                                                                                                                                                                                                                                                                                                                                                                                                                                                                                                                     | Mr Andrew J. Sharp     |
|                             | March of Dimes Foundation (6-FY13-92)                                                                                                                                                                                                                                                                                                                                                                                                                                                                                                                                                                                                                                                                                                                                                                                                                                                                                                                                                                                                                                                                                                                                                                                                                                                                                                                                                                                                                                                                                                                                                                                                                                                                                                        | Mr Andrew J. Sharp     |
|                             | Ministerio de Economía y Competitividad (BFU2015-7116-ERC)                                                                                                                                                                                                                                                                                                                                                                                                                                                                                                                                                                                                                                                                                                                                                                                                                                                                                                                                                                                                                                                                                                                                                                                                                                                                                                                                                                                                                                                                                                                                                                                                                                                                                   | Mr Tomas Marques-Bonet |
|                             | Ministerio de Economía y Competitividad (BFU2015-6215-ERC)                                                                                                                                                                                                                                                                                                                                                                                                                                                                                                                                                                                                                                                                                                                                                                                                                                                                                                                                                                                                                                                                                                                                                                                                                                                                                                                                                                                                                                                                                                                                                                                                                                                                                   | Mr Tomas Marques-Bonet |
|                             | National Institutes of Health (HG002385)                                                                                                                                                                                                                                                                                                                                                                                                                                                                                                                                                                                                                                                                                                                                                                                                                                                                                                                                                                                                                                                                                                                                                                                                                                                                                                                                                                                                                                                                                                                                                                                                                                                                                                     | Mr Evan E. Eichler     |
|                             | National Institutes of Health (HG007990)                                                                                                                                                                                                                                                                                                                                                                                                                                                                                                                                                                                                                                                                                                                                                                                                                                                                                                                                                                                                                                                                                                                                                                                                                                                                                                                                                                                                                                                                                                                                                                                                                                                                                                     | Mr Benedict Paten      |
|                             | National Institutes of Health (HG007234)                                                                                                                                                                                                                                                                                                                                                                                                                                                                                                                                                                                                                                                                                                                                                                                                                                                                                                                                                                                                                                                                                                                                                                                                                                                                                                                                                                                                                                                                                                                                                                                                                                                                                                     | Mr Benedict Paten      |
| <b>Abstract:</b>            | <p><b>Background:</b><br/>The chimpanzee is arguably the most important species for the study of human origins. A key resource for these studies is a high quality reference genome assembly, however, as most mammalian genomes, the current iteration of the chimpanzee reference genome assembly it is highly fragmented. In the current iteration of the chimpanzees reference genome assembly (Pan_tro_2.1.4), the sequence is scattered across more than 183,000 contigs and incorporating over 159,000 gaps, with a genome wide contig N50 of 51 Kbp.</p> <p><b>Findings:</b><br/>In this work we produce an extensive and diverse array of sequencing datasets to rapidly assemble a new chimpanzee reference that surpasses previous iterations in bases represented and organized in large scaffolds. To this end, we show substantial improvements over the current release of the chimpanzee genome (Pan_tro_2.1.4) by several metrics, such as: increased contiguity by &gt;750% and 300% on contigs and scaffolds, respectively; closure of 77% of gaps in the Pan_tro_2.1.4 assembly gaps spanning &gt;850 Kbp of novel coding sequence based on RNASeq data. We furthermore report over 2,700 genes that had putatively erroneous frame-shift predictions to human in Pan_tro_2.1.4 and show a substantial increase in the annotation of repetitive elements.</p> <p><b>Conclusions:</b><br/>We apply a simple 3-way hybrid approach to considerably improve the reference genome assembly for the chimpanzee, providing a valuable resource to study human origins. We furthermore produced extensive sequencing datasets that are all derived from the same cell line, generating a broad non-human benchmark dataset.</p> |                        |

|                                                      |                              |
|------------------------------------------------------|------------------------------|
| <b>Corresponding Author:</b>                         | Lukas F. K. Kuderna<br>SPAIN |
| <b>Corresponding Author Secondary Information:</b>   |                              |
| <b>Corresponding Author's Institution:</b>           |                              |
| <b>Corresponding Author's Secondary Institution:</b> |                              |
| <b>First Author:</b>                                 | Lukas F. K. Kuderna          |
| <b>First Author Secondary Information:</b>           |                              |
| <b>Order of Authors:</b>                             | Lukas F. K. Kuderna          |
|                                                      | Chad Tomlinson               |
|                                                      | LaDeana W. Hillier           |
|                                                      | Annabel Tran                 |
|                                                      | Ian Fiddes                   |
|                                                      | Joel Armstrong               |
|                                                      | Hafid Laayouni               |
|                                                      | David Gordon                 |
|                                                      | John Huddleston              |
|                                                      | Raquel Garcia Perez          |
|                                                      | Inna Povolotskaya            |
|                                                      | Aitor Serres Armero          |
|                                                      | Jèssica Gómez Garrido        |
|                                                      | Daniel Ho                    |
|                                                      | Paolo Ribeca                 |
|                                                      | Tyler Alioto                 |
|                                                      | Richard E. Green             |
|                                                      | Benedict Paten               |
|                                                      | Arcadi Navarro               |
|                                                      | Jaume Betranpetit            |
|                                                      | Javier Herrero               |
|                                                      | Evan E. Eichler              |
|                                                      | Andrew J. Sharp              |
|                                                      | Lars Feuk                    |
|                                                      | Wesley C. Warren             |
|                                                      | Tomas Marques-Bonet          |
| <b>Order of Authors Secondary Information:</b>       |                              |
| <b>Opposed Reviewers:</b>                            |                              |
| <b>Additional Information:</b>                       |                              |
| <b>Question</b>                                      | <b>Response</b>              |
| Are you submitting this manuscript to a              | No                           |

|                                                                                                                                                                                                                                                                                                                                                                                                                                                                                                                                                         |     |
|---------------------------------------------------------------------------------------------------------------------------------------------------------------------------------------------------------------------------------------------------------------------------------------------------------------------------------------------------------------------------------------------------------------------------------------------------------------------------------------------------------------------------------------------------------|-----|
| special series or article collection?                                                                                                                                                                                                                                                                                                                                                                                                                                                                                                                   |     |
| <p><b>Experimental design and statistics</b></p> <p>Full details of the experimental design and statistical methods used should be given in the Methods section, as detailed in our <a href="#">Minimum Standards Reporting Checklist</a>. Information essential to interpreting the data presented should be made available in the figure legends.</p> <p>Have you included all the information requested in your manuscript?</p>                                                                                                                      | Yes |
| <p><b>Resources</b></p> <p>A description of all resources used, including antibodies, cell lines, animals and software tools, with enough information to allow them to be uniquely identified, should be included in the Methods section. Authors are strongly encouraged to cite <a href="#">Research Resource Identifiers</a> (RRIDs) for antibodies, model organisms and tools, where possible.</p> <p>Have you included the information requested as detailed in our <a href="#">Minimum Standards Reporting Checklist</a>?</p>                     | Yes |
| <p><b>Availability of data and materials</b></p> <p>All datasets and code on which the conclusions of the paper rely must be either included in your submission or deposited in <a href="#">publicly available repositories</a> (where available and ethically appropriate), referencing such data using a unique identifier in the references and in the “Availability of Data and Materials” section of your manuscript.</p> <p>Have you have met the above requirement as detailed in our <a href="#">Minimum Standards Reporting Checklist</a>?</p> | Yes |

1 **A 3-way hybrid approach to generate a new high quality chimpanzee**  
2 **reference genome (Pan\_tro\_3.0)**

3 **Lukas F.K. Kuderna<sup>1</sup>, Chad Tomlinson<sup>2</sup>, LaDeana W. Hillier<sup>2</sup>, Annabel**  
4 **Tran<sup>3</sup>, Ian Fiddes<sup>4</sup>, Joel Armstrong<sup>4</sup>, Hafid Laayouni<sup>1</sup>, David Gordon<sup>5</sup>, John**  
5 **Huddleston<sup>5</sup>, Raquel Garcia Perez<sup>1</sup>, Inna Povolotskaya<sup>1</sup>, Aitor Serres Armero<sup>1</sup>,**  
6 **Jèssica Gómez Garrido<sup>6</sup>, Daniel Ho<sup>7</sup>, Paolo Ribeca<sup>8</sup>, Tyler Alioto<sup>6</sup>, Richard E.**  
7 **Green<sup>9,12</sup>, Benedict Paten<sup>4</sup>, Arcadi Navarro<sup>1,6,10</sup>, Jaume Betranpetit<sup>1</sup>, Javier**  
8 **Herrero<sup>3</sup>, Evan E. Eichler<sup>5</sup>, Andrew J. Sharp<sup>7</sup>, Lars Feuk<sup>11,\*</sup>, Wesley C.**  
9 **Warren<sup>2,\*</sup>, Tomas Marques-Bonet<sup>1,6,10\*</sup>**

10  
11 (1) Institut de Biologia Evolutiva, (CSIC-Universitat Pompeu Fabra), PRBB, Doctor Aiguader 88,  
12 Barcelona, Catalonia 08003, Spain.

13 (2) McDonnell Genome Institute, Department of Medicine, Department of Genetics, Washington  
14 University School of Medicine, St. Louis, MO 63108, USA.

15 (3) Bill Lyons Informatics Centre, UCL Cancer Institute, University College London, London, UK.

16 (4) Genomics Institute, University of California Santa Cruz and Howard Hughes Medical Institute,  
17 Santa Cruz, CA 95064, USA.

18 (5) Department of Genome Sciences, University of Washington School of Medicine, Seattle, WA  
19 98195, USA.

20 (6) CNAG-CRG, Centre for Genomic Regulation (CRG), Baldori i Reixac 4, 08028, Barcelona, Spain.

21 (7) Department of Genetics and Genomic Sciences, Icahn School of Medicine at Mount Sinai, New  
22 York, NY 10029, USA

23 (8) The Pirbright Institute, Ash Road, Pirbright, Woking, GU24 0NF, United Kingdom

24 (9) Department of Biomolecular Engineering, University of California Santa Cruz, 1156 High Street,  
25 Santa Cruz, CA 95060, USA.

26 (10) Institutio Catalana de Recerca i Estudis Avançats (ICREA), Barcelona, Catalonia 08010, Spain

27 (11) Department of Immunology, Genetics and Pathology, Science for Life Laboratory, Uppsala  
28 University, Uppsala, Sweden

29 (12) Dovetail Genomics, Santa Cruz, CA 95060, USA

## 30 **Abstract**

### 31 **Background**

32 The chimpanzee is arguably the most important species for the study of human  
33 origins. A key resource for these studies is a high quality reference genome assembly,  
34 however, as most mammalian genomes, the current iteration of the chimpanzee  
35 reference genome assembly it is highly fragmented. In the current iteration of the  
36 chimpanzees reference genome assembly (Pan\_tro\_2.1.4), the sequence is scattered  
37 across more than 183,000 contigs and incorporating over 159,000 gaps, with a  
38 genome wide contig N50 of 51 Kbp.

### 39 **Findings**

40 In this work we produce an extensive and diverse array of sequencing datasets to  
41 rapidly assemble a new chimpanzee reference that surpasses previous iterations in  
42 bases represented and organized in large scaffolds. To this end, we show substantial  
43 improvements over the current release of the chimpanzee genome (Pan\_tro\_2.1.4) by  
44 several metrics, such as: increased contiguity by >750% and 300% on contigs and  
45 scaffolds, respectively; closure of 77% of gaps in the Pan\_tro\_2.1.4 assembly gaps  
46 spanning >850 Kbp of novel coding sequence based on RNASeq data. We  
47 furthermore report over 2,700 genes that had putatively erroneous frame-shift  
48 predictions to human in Pan\_tro\_2.1.4 and show a substantial increase in the  
49 annotation of repetitive elements.

1  
2  
3  
4  
5  
6  
7  
8  
9  
10  
11  
12  
13  
14  
15  
16  
17  
18  
19  
20  
21  
22  
23  
24  
25  
26  
27  
28  
29  
30  
31  
32  
33  
34  
35  
36  
37  
38  
39  
40  
41  
42  
43  
44  
45  
46  
47  
48  
49  
50  
51  
52  
53  
54  
55  
56  
57  
58  
59  
60  
61  
62  
63  
64  
65  
66  
67  
68  
69  
70  
71  
72  
73

## Conclusions

We apply a simple 3-way hybrid approach to considerably improve the reference genome assembly for the chimpanzee, providing a valuable resource to study human origins. We furthermore produced extensive sequencing datasets that are all derived from the same cell line, generating a broad non-human benchmark dataset.

## Keywords

Chimpanzee reference genome, Assembly, Genomics

## Data description

### Creating a non-human sequencing benchmark dataset

To test the potentially combinatorial power of varied sequencing and mapping strategies, we created several different datasets on different platforms, all derived from a single male western chimpanzee ('Clint', Coriell identifier S006007), the same individual used to generate the current Chimpanzee genome assembly. We produced ~120-fold sequence coverage of overlapping 250 bps reads (~400 bps fragment) on the Illumina HiSeq 2500 platform; ~9-fold sequence coverage from 43 Pacific Biosciences SMRT-Cells with P5-C3 chemistry on the RSII instrument; Illumina TruSeq Synthetic long reads at around 2-fold coverage; 1 lane of *in vitro* proximity ligation read pairs (prepared as a Chicago library by Dovetail Genomics) sequenced on the Illumina HiSeq 2000 platform.

These diverse datasets complement the resources that were already available for the same cell line, namely 6-fold coverage of ABI Sanger capillary reads used for the initial chimpanzee genome assembly, a 100 bps paired Illumina HiSeq data, a fosmid library at 6-fold physical coverage with available end sequences, a BAC library at 3-

1 74 fold physical coverage with available end sequences and around 700 finished BACs  
2 75 [1]. Altogether, these data constitute an extensive and, to our knowledge,  
3  
4 76 unprecedented non-human, non-model organism benchmarking dataset for different  
5  
6  
7 77 sequencing strategies.  
8  
9

10 78

## 11 12 13 79 **Assembly generation** 14

15 80 We generated a complete *de novo* assembly for the chimpanzee with a combination of  
16  
17 81 the datasets. At each step of our assembly we measured increase in contiguity by  
18  
19  
20 82 means of the N50 statistic, which is defined as the length of a contig or scaffold such  
21  
22 83 that 50% of the assembly bases are contained in contigs or scaffolds of at least that  
23  
24  
25 84 length. The starting point of our assembly scaffolding efforts are contigs generated  
26  
27 85 with DISCOVAR *de novo* [2] from 250 bps paired end reads. These reads are derived  
28  
29 86 from a 400 bps library, resulting in pairs that overlap over a ~50 bps region, a feature  
30  
31  
32 87 that is exploited by the assembler. While based on Illumina sequencing, these libraries  
33  
34  
35 88 have recently been shown to produce assemblies superior in contiguity when  
36  
37 89 compared to assemblies derived from conventional Illumina libraries [3]. Our base  
38  
39 90 assembly had a contig N50 of 87 Kbp, and was then scaffolded using proximity  
40  
41  
42 91 ligation read-pairs generated by the Chicago method [4] and sequenced on the  
43  
44  
45 92 Illumina platform. These data increased the N50 to 26 Mbp. Notably, individual  
46  
47 93 scaffolds exceed lengths of 75 Mbp and therefore already reach the order of  
48  
49  
50 94 magnitude of full chromosomal arms. Despite a substantial gain in scaffold  
51  
52 95 continuity, remaining gap structure required us to attempt closure with long-read  
53  
54 96 single molecule sequences by PacBio using PBJelly [5]. By this means, we filled over  
55  
56  
57 97 38,000 gaps (or 55%) among all scaffolds and in so doing increased the contig N50  
58  
59 98 by over 320% to 283 Kbp when compared to the base assembly (see Table 1). While  
60  
61  
62  
63  
64  
65

1  
2  
3  
4  
5  
6  
7  
8  
9  
10  
11  
12  
13  
14  
15  
16  
17  
18  
19  
20  
21  
22  
23  
24  
25  
26  
27  
28  
29  
30  
31  
32  
33  
34  
35  
36  
37  
38  
39  
40  
41  
42  
43  
44  
45  
46  
47  
48  
49  
50  
51  
52  
53  
54  
55  
56  
57  
58  
59  
60  
61  
62  
63  
64  
65

99 we went on to further improve the assembly with additional data (see below), these  
100 statistics give an approximation of the contiguity that can be expected for *de novo*  
101 assemblies of previously unsequenced species using our three-way hybrid approach:  
102 contigs derived from overlapping 250 bps paired end reads to scaffold with in vitro  
103 HiC, and fill remaining gaps with PacBio data. When the contiguity metrics of this  
104 intermediate assembly are compared to other representative non-human primate  
105 genomes (as annotated by NCBI Refseq category, July 1, 2016; see supplementary  
106 material), we observed superior connectivity in contig structure within our assembly  
107 compared to all others. The only exception is the gorilla genome, recently assembled  
108 from deep (~75-fold) long-read sequences [6]. However, our stepwise method offers  
109 an approach that is considerably cheaper.

110

#### 111 **Assembly refinement and comparison to Pan\_tro\_2.1.4**

112 For the final release of the chimpanzee assembly, we created a reference assembly  
113 that leveraged previous resources generated from the same individual [1]. First, we  
114 merged in regions from Pan\_tro\_2.1.4 that were derived from Clint and gapped in our  
115 assembly. It is known that Pan\_tro\_2.1.4 contains sequences from different  
116 chimpanzees. To do so, we extracted flanking sequence regions of gaps in our  
117 assembly and mapped all to Pan\_tro\_2.1.4, keeping only unique and concordant  
118 mappings that do not span any gaps within Pan\_tro\_2.1.4, and merged the spanned  
119 Pan\_tro\_2.1.4 sequence in.

120 To ensure accuracy was not sacrificed for continuity gains we utilized various  
121 methods to measure error. Given that our assembly likely contained some erroneous  
122 links between contigs or misassembled contigs as a result of *de novo* assembly,



123 conformational mapping or merging mistakes, we first used discordant mapping of  
124 fosmid end sequences (~40 Kbp insert size) to identify any large misassemblies. We  
125 identified 17 such scaffold errors and manually broke apart each. We also sought to  
126 correct any remaining single base substitutions or small indels (<6 bps) with a series  
127 of custom mapping and base integration programs (see supplementary material). With  
128 the same Illumina data used to generate the first draft assembly (DISCOVAR *de*  
129 *novo*) we corrected more than 500,000 single base or indel errors. As another measure  
130 of quality we produced whole genome alignments to Pan\_tro\_2.1.4 and find our  
131 assembly aligns with on average 99.9% identity, and the magnitude of remaining  
132 differences can thus reasonably explained by the allelic diversity of western  
133 chimpanzees [7].

134 Our final assembly, named Pan\_tro\_3.0, spans 2.95 Gbp in ordered and oriented  
135 chromosomal sequences. An additional 140 Mbp of sequence is assigned to  
136 chromosomes, but their order and orientation unknown, and 123 Mbp remain of  
137 unknown chromosomal origin. Pan\_tro\_3.0 has a genome-wide contig and scaffold  
138 N50 of 385 Kbp and 27 Mbp, respectively, constituting an improvement in contiguity  
139 over Pan\_tro\_2.1.4 of 760% and 300%, respectively (see Figure 1a and Table1). We  
140 observed this increase across all non-finished chromosomes, with the most  
141 pronounced effect on the X chromosome (see Figure 1b). This chromosome shows the  
142 highest degree of fragmentation in Pan\_tro\_2.1.4, likely due to the fact that the  
143 effective sequence coverage on the sex chromosomes is only half that of the  
144 autosomes, namely around 3-fold in the original assembly. We increased the contig  
145 N50 on the X chromosome by 3,250% from 13 Kbp to 422 Kbp, thus bringing its  
146 contiguity to the range observed on autosomes.

147 Overall, we decreased the number of contigs by more than 60% from 183,860 to  
 148 72,226 and the number of gaps by 83% from 156,857 to 26,715. As gap structures  
 149 between the assemblies may not correspond, we identified filled gaps from  
 150 Pan\_tro\_2.1.4 by extracting their flanking regions and mapping them onto  
 151 Pan\_tro\_3.0. By keeping only unique and concordant mappings that do not span any  
 152 gaps in Pan\_tro\_3.0, we estimate the sequences of 122,943 (77%) gaps to be filled,  
 153 amounting for 60.3 Mbp of sequence. The majority of these fill sequences are  
 154 comparably short (see Figure 1C) and significantly enriched in interspersed genomic  
 155 repeats with 58% of them ( $p < 0.0001$ , feature permutation test) into repeats. Of these,  
 156 around 16 Mbp are fully embedded within fill sequences corresponding to, amongst  
 157 others, over 29,650 novel short interspersed nuclear elements (SINE) and 20,888  
 158 novel long interspersed nuclear elements (LINE) annotations.

160 **Table 1 - Assembly statistics comparing the previous chimpanzee assembly, our intermediary assembly**  
 161 **based on the 3-way hybrid and the finished assembly Pan\_tro\_3.0. In this context, we defined gaps at**  
 162 **stretches of at least 10 consecutive “N” in the assembly. Contigs are defined as contiguous stretches of**  
 163 **sequence without gaps.**

|                                      | <b>Pan_tro_2.1.4</b> | <b>3-way hybrid<br/>(intermediary)</b> | <b>Pan_tro_3.0</b> |
|--------------------------------------|----------------------|----------------------------------------|--------------------|
| <b>Scaffold N50 (bps)</b>            | 8,925,874            | 26,681,610                             | 26,972,556         |
| <b>Contig N50 (bps)</b>              | 50,665               | 282,774                                | 384,816            |
| <b>Contig N90 (bps)</b>              | 7,231                | 41,655                                 | 53,112             |
| <b>Assembly length (bps)</b>         | 3,309,577,923        | 2,992,696,208                          | 3,231,154,112      |
| <b>Assembly length w/o N's (bps)</b> | 2,902,338,968        | 2,990,712,612                          | 3,132,603,062      |
| <b>Scaffolds</b>                     | 24,129               | 45,000                                 | 44,448             |

|                |         |        |        |
|----------------|---------|--------|--------|
| <b>Contigs</b> | 183,827 | 76,674 | 72,226 |
| <b>Gaps</b>    | 159,698 | 31,674 | 26,715 |

164

165 **Repeat resolution**

166 Large genomic repeats constitute a major confounding factor in genome assembly and  
167 are therefore one of the main reasons for their fragmentation and thus, the assembly  
168 repeat representation can be a proxy of its quality. To assess the repeat resolution of  
169 interspersed repeats, we masked Pan\_tro\_3.0 using RepeatMasker [8] selecting  
170 chimpanzee specific repeats, resulting in 1.64 Gbp (52.2%) being annotated as  
171 repeats. The proportion of repetitive elements is similar in Pan\_tro\_2.1.4 (50.9%),  
172 however, given the large amount of newly resolved sequences this translates into a  
173 substantial increase in annotated repeats. Specifically, we annotate 164 Mbp of novel  
174 repeats in Pan\_tro\_3.0, comprising around 10% of the whole repeat annotation. We  
175 observe this increase consistently across all families of interspersed repeats (see  
176 Figure 1D). The increases range as high as 300% for satellite sequences,  
177 corresponding to an additional 68.2 Mbp of newly resolved sequence in this category.  
178 We also increased the amount of annotated SINE by 27.9 Mbp, including 83,637  
179 additional resolved copies of *Alu* elements. We find the increase in annotations to be  
180 negatively correlated with age for *Alu* elements, and thus find the highest increase  
181 (8.8%) for the youngest and least divergent subfamily (*AluY*), suggesting that  
182 common high identity repeats are now better resolved. We furthermore added 38.2  
183 Mbp of LINE to the assembly, corresponding to over 44,791 additional copies of L1  
184 elements. We also observed a noteworthy increase in annotated long terminal repeats  
185 (LTR), adding 15.9 Mbp to this repeat category, corresponding to 30,574 additional  
186 annotated copies of endogenous retroviruses (ERV) in the genome. When comparing

1  
2  
3  
4  
5  
6  
7  
8  
9  
10  
11  
12  
13  
14  
15  
16  
17  
18  
19  
20  
21  
22  
23  
24  
25  
26  
27  
28  
29  
30  
31  
32  
33  
34  
35  
36  
37  
38  
39  
40  
41  
42  
43  
44  
45  
46  
47  
48  
49  
50  
51  
52  
53  
54  
55  
56  
57  
58  
59  
60  
61  
62  
63  
64  
65

187 all types of interspersed repeats between Pan\_tro\_2.1.4 and Pan\_tro\_3.0, we find a  
188 median increase of 4.7% of sequence, highlighting that repeat resolution is much  
189 improved in Pan\_tro\_3.0 (see supplementray table S4).

## 190 **Representation of segmental duplications**

191 To analyze the representation of segmental duplications in Pan\_tro\_3.0, we applied  
192 two alternative approaches: First, we performed a whole genome assembly  
193 comparison (WGAC) to compare repeat-free sequences of the assembly to itself. This  
194 method identifies duplicated sequence in blocks of at least 1 Kbp with 90% identity or  
195 higher. Excluding unplaced contigs, we find 140 Mbp of non-redundant duplicated  
196 sequence in Pan\_tro\_3.0 chromosomes, or 4.46% of the non-gap bases in the  
197 assembly, results that are consistent with previous read-depth estimates for  
198 chimpanzee [9] and analyses of high quality, finished human genome assemblies (see  
199 supplementary material S3). Second, we identified duplications by whole-genome  
200 shotgun sequence detection (WSSD) that identifies duplications at least 10 Kbp long  
201 with over 94% identity by detecting regions of increased read depth compared to  
202 known unique regions. We used 31,366,275 Sanger capillary reads derived from  
203 Clint, and find 51 Mbp of duplicated sequence meeting these criteria on placed  
204 chromosomes, compared to 68 Mbp detected by WGAC.

205 Genome wide, we discovered 178,245 redundant pairwise alignments corresponding  
206 to 388 Mbp of non-redundant sequence above 1Kbp in length and 90% identity  
207 (12.39% of the genome sequence excluding gaps) by WGAC, and 63 Mbp of  
208 duplicated sequence by WSSD (compared to 284 Mbp WGAC  $\geq 10$  Kbp,  $>94\%$   
209 identity). Altogether, these results suggest that segmental duplications are well  
210 resolved in Pan\_tro\_3.0 on the chromosomal level, however, we are likely to be

1  
2  
3  
4  
5  
6  
7  
8  
9  
10  
11  
12  
13  
14  
15  
16  
17  
18  
19  
20  
21  
22  
23  
24  
25  
26  
27  
28  
29  
30  
31  
32  
33  
34  
35  
36  
37  
38  
39  
40  
41  
42  
43  
44  
45  
46  
47  
48  
49  
50  
51  
52  
53  
54  
55  
56  
57  
58  
59  
60  
61  
62  
63  
64  
65

211 overestimating the total amount of segmental duplications genome wide by including  
212 an elevated rate of false-positive paralogous regions localized on unplaced scaffolds.

### 213 **Gene annotation**

214 We produced a new gene annotation based on projections from all human transcripts  
215 in the GENCODE annotation V24 set combined with RNA-seq data derived from  
216 brain, heart, liver and testis from three different individuals [10]. To quantify the  
217 effect of the underlying sequence on the annotation, we annotated Pan\_tro\_2.1.4. with  
218 the same data. We observe improvements in gene annotation in Pan\_tro\_3.0 in all  
219 considered metrics: We increased the number of recovered consensus gene models for  
220 protein coding transcripts by 2.7%, and are now able to project and annotate 89.5% of  
221 the GENCODE human coding transcripts onto the new assembly. The average  
222 coverage of these transcripts within the genome is 98.9%, a gain of 2%. We observe  
223 an increase of 6.6% in transcripts with multiple mappings, suggesting that paralogous  
224 coding duplications are better represented in this assembly. We checked for newly  
225 resolved exonic sequences in filled gaps with respect to Pan\_tro\_2.1.4, and find  
226 17,818 exons, amounting to 851 Kbp of non-overlapping sequence to be fully  
227 embedded within them. Altogether, we retrieved models for 77,858 coding transcripts  
228 corresponding to the isoforms of 20,373 coding genes.

229 Perhaps most strikingly, we found 5,039 human coding transcripts corresponding to  
230 2,728 genes with predicted frameshift mutations in Pan\_tro\_2.1.4 to human, but not in  
231 Pan\_tro\_3.0. Given that both assemblies are mainly based on data from the same  
232 individual, the majority of these predictions constitute putative sequence errors in  
233 Pan\_tro\_2.1.4.

234

1  
2  
3  
4  
5  
6  
7  
8  
9  
10  
11  
12  
13  
14  
15  
16  
17  
18  
19  
20  
21  
22  
23  
24  
25  
26  
27  
28  
29  
30  
31  
32  
33  
34  
35  
36  
37  
38  
39  
40  
41  
42  
43  
44  
45  
46  
47  
48  
49  
50  
51  
52  
53  
54  
55  
56  
57  
58  
59  
60  
61  
62  
63  
64  
65

235 In summary, we describe a hybrid assembly approach to obtain a more complete de  
236 novo chimpanzee reference genome assembly, substantially increasing contiguity  
237 metrics within it.

238

239

## 240 **Figure 1**

241 A: Genome wide distribution of contig lengths between Pan\_tro\_2.1.4 and  
242 Pan\_tro\_3.0. The peak for Pan\_tro\_3.0 is shifted to higher values by an order of  
243 magnitude.

244 B: Increase in contig N50 for all chromosomes that were not finished with clones in  
245 Pan\_tro\_2.1.4 or Pan\_tro\_3.0.

246 C: Length distribution of filled gaps in Pan\_tro\_3. Negative values constitute wrongly  
247 separated overlapping contig ends in Pan\_tro\_2.1.4.

248 D: Increase in annotated interspersed repeats separated by repeat family.

249

## 250 **Declarations**

## 251 **Abbreviations**

252 bps: base pairs, Kbp: kilo base pairs, Mbp: mega base pairs, indel: insertion-deletion,  
253 SINE: short interspersed nuclear element, LINE: long interspersed nuclear element,  
254 LTR: long terminal repeat, ERV: endogenous retrovirus, WGAC: whole genome  
255 assembly comparison, WSSD: whole-genome shotgun sequence detection.

1  
2  
3  
4  
5  
6  
7  
8  
9  
10  
11  
12  
13  
14  
15  
16  
17  
18  
19  
20  
21  
22  
23  
24  
25  
26  
27  
28  
29  
30  
31  
32  
33  
34  
35  
36  
37  
38  
39  
40  
41  
42  
43  
44  
45  
46  
47  
48  
49  
50  
51  
52  
53  
54  
55  
56  
57  
58  
59  
60  
61  
62  
63  
64  
65

256

257 **Competing interests**

258 REG is co-founder of Dovetail Genomics

259

260 **Funding**

261 LFKK is supported by an FPI fellowship associated to BFU2014-55090-P (FEDER);

262 LF is supported by the Swedish Foundation for Strategic Research F06-0045 and the

263 Swedish Research Council; EEE is an investigator of the Howard Hughes Medical

264 Institute. AJS is supported by NIH grants DA033660, HG006696, HD073731 and

265 MH097018, and research grant 6-FY13-92 from the March of Dimes TMB is

266 supported by MINECO BFU2014-55090-P (FEDER), BFU2015-7116-ERC and

267 BFU2015-6215-ERC, Fundacio Zoo Barcelona and Secretaria d'Universitats i

268 Recerca del Departament d'Economia i Coneixement de la Generalitat de Catalunya.

269 This work was supported, in part, by grants from the U.S. National Institutes of

270 Health (NIH grants HG002385 to E.E.E., HG007990 and HG007234 to B.P.).

271

272 **Author's Contributions**

273 TMB, WCW and LF conceived the study; LFKK, CT, LWH and REG produced and

274 analyzed the assembly; IF, JA, JGG, TA, BP, AT, HL, JB, RGP, IP, ASA, JHe, PR,

275 DH, AN, and AJS produced, analyzed and interpreted the assembly and annotations;

276 DG, JHu and EEE analyzed segmental duplications; TMB, WCW and LFKK wrote

277 the manuscript with input from all authors.

1  
2  
3  
4  
5  
6  
7  
8  
9  
10  
11  
12  
13  
14  
15  
16  
17  
18  
19  
20  
21  
22  
23  
24  
25  
26  
27  
28  
29  
30  
31  
32  
33  
34  
35  
36  
37  
38  
39  
40  
41  
42  
43  
44  
45  
46  
47  
48  
49  
50  
51  
52  
53  
54  
55  
56  
57  
58  
59  
60  
61  
62  
63  
64  
65

278

## 279 **Acknowledgements**

280 We would like to acknowledge Bojan Obradovic and James Richardson for sequence  
281 contribution. The authors acknowledge the use of the UCL Legion High Performance  
282 Computing Facility ([Legion@UCL](#)), and associated support services, in the  
283 completion of this work.

284

## 285 **Availability of supporting data**

286 Supporting data area available through the GigaDB database. This Whole Genome  
287 Shotgun project has been deposited at DDBJ/ENA/GenBank under the accession  
288 AACZ000000000. The version described in this paper is version AACZ040000000. The  
289 assembly is available at [https://www.ncbi.nlm.nih.gov/assembly/GCF\\_000001515.7](https://www.ncbi.nlm.nih.gov/assembly/GCF_000001515.7)  
290 and at the UCSC genome browser under the identifier panTro5.

291

## 292 **References**

- 293 1. Mikkelsen TS, , Evan E. Eichler MCZ, Jaffe, David B., Yang S-P, , Wolfgang  
294 Enard IH, Bork, Peer, Butler J, Fronick, et al. Initial sequence of the chimpanzee  
295 genome and comparison with the human genome. *Nature*. 2005;437:69–87.
- 296 2. Weisenfeld NI, Yin S, Sharpe T, Lau B, Hegarty R, Holmes L, et al.  
297 Comprehensive variation discovery in single human genomes. *Nat. Genet.*;  
298 2014;46:1350–5.
- 299 3. Chaisson MJP, Wilson RK, Eichler EE. Genetic variation and the de novo  
300 assembly of human genomes. *Nat. Rev. Genet.*; 2015;16:627–40.



1  
2  
3  
4  
5  
6  
7  
8  
9  
10  
11  
12  
13  
14  
15  
16  
17  
18  
19  
20  
21  
22  
23  
24  
25  
26  
27  
28  
29  
30  
31  
32  
33  
34  
35  
36  
37  
38  
39  
40  
41  
42  
43  
44  
45  
46  
47  
48  
49  
50  
51  
52  
53  
54  
55  
56  
57  
58  
59  
60  
61  
62  
63  
64  
65

301 4. Putnam NH, Connell BO, Stites JC, Rice BJ, Hartley PD, Sugnet CW, et al.  
302 Chromosome-scale shotgun assembly using an in vitro method for long-range linkage.  
303 Genome Res. 2016;1–25.

304 5. English AC, Richards S, Han Y, Wang M, Vee V, Qu J, et al. Mind the gap:  
305 upgrading genomes with Pacific Biosciences RS long-read sequencing technology.  
306 Liu Z, editor. PLoS One; 2012

307 6. Gordon D, Huddleston J, Chaisson MJP, Hill CM, Kronenberg ZN, Munson KM,  
308 et al. Long-read sequence assembly of the gorilla genome. Science;2016;0344.

309 7. Prado-Martinez J, Sudmant PH, Kidd JM, Li H, Kelley JL, Lorente-Galdos B, et al.  
310 Great ape genetic diversity and population history. Nature. 2013;499:471–5.

311 8. Smit A, Hubley R, Green P. RepeatMasker Open-3.0. RepeatMasker. 1996. p.  
312 www.repeatmasker.org.

313 9. Cheng Z, Ventura M, She X, Khaitovich P, Graves T, Osoegawa K, et al. A  
314 genome-wide comparison of recent chimpanzee and human segmental duplications.  
315 Nature. 2005;437:88–93.

316 10. Ruiz-Orera J, Hernandez-Rodriguez J, Chiva C, Sabidó E, Kondova I, Bontrop R,  
317 et al. Origins of De Novo Genes in Human and Chimpanzee. Noonan J, editor. PLOS  
318 Genet.;2015;11:e1005721.  
319

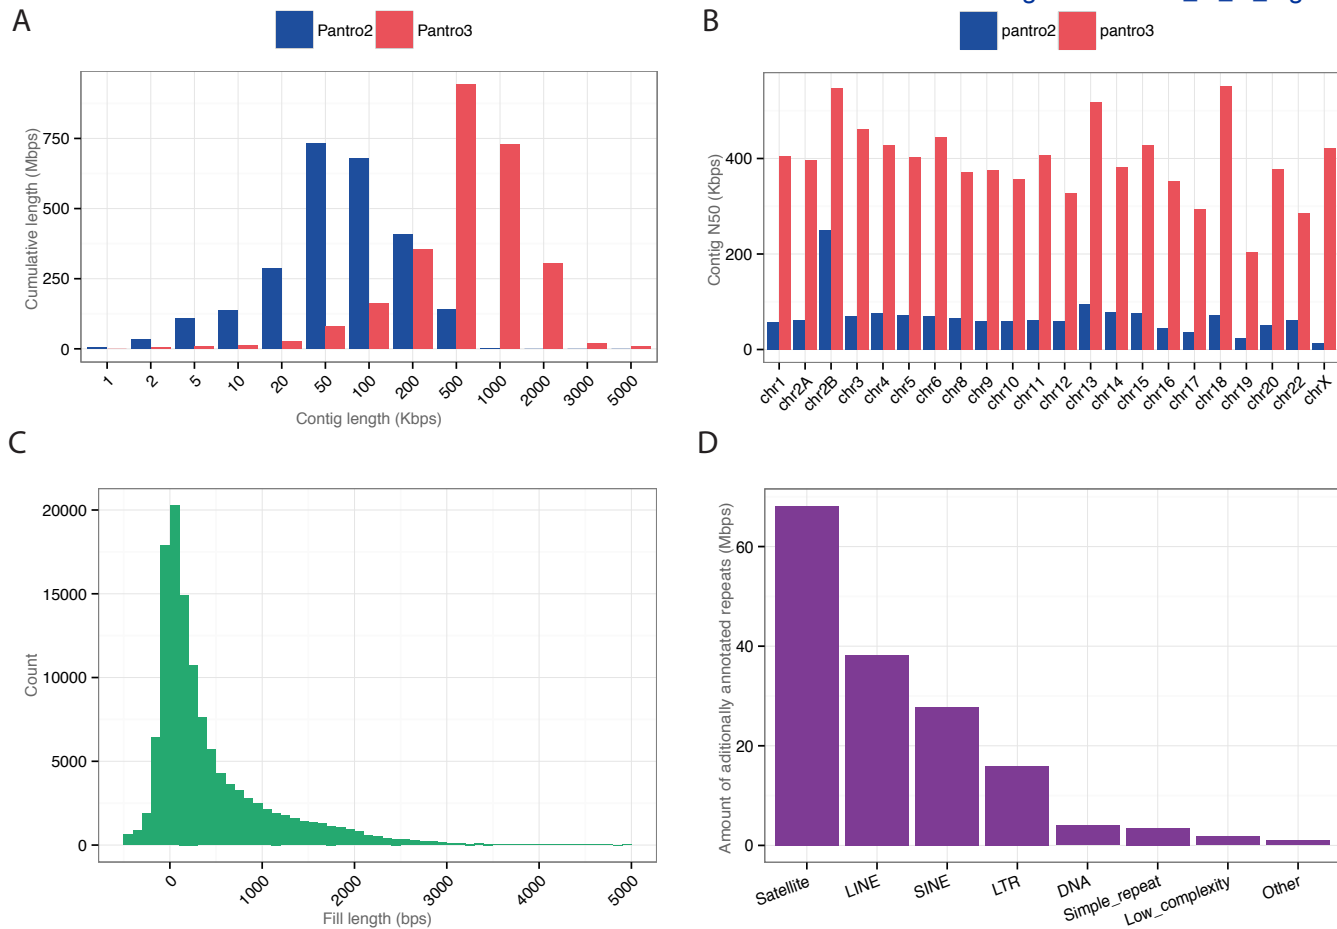

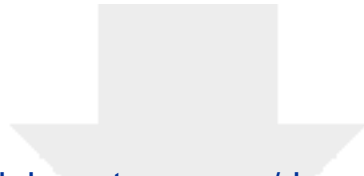

[Click here to access/download](#)

**Supplementary Material**

**Kuderna\_et\_al.SUPPLEMENTARY.docx**

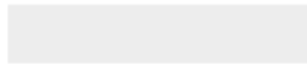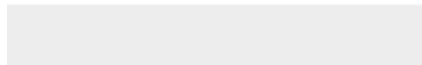



Click here to access/download  
**Supplementary Material**  
**DATA\_SUBMISSION\_FILE**

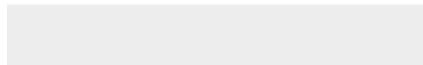

Supplement: gix098_giga-d-16-00140_original-submission.pdf [file gix098_giga-d-16-00140_original-submission.pdf]
